# Supplementary material
Source: Springer Nature journal article supplement (https://www.springermedizin.de/resource/supplementary/40248_2012_41_MOESM2_ESM.pdf/9686000)

normal lung

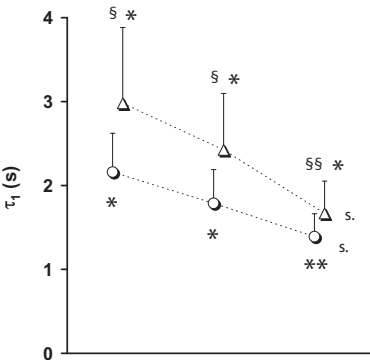

ARDS

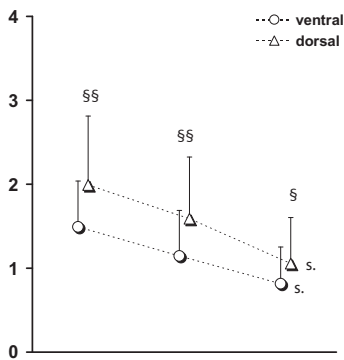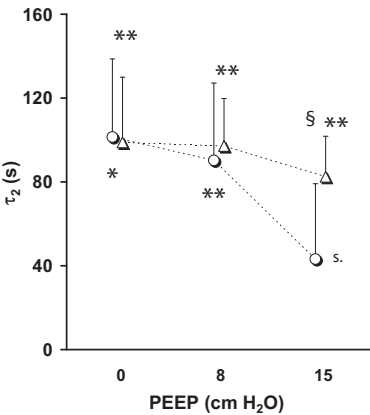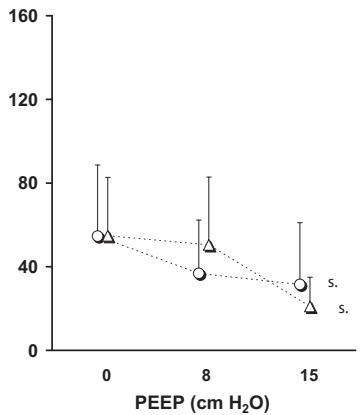

Supplement: MOESM2 [file 9686000]
